# Supplementary material for: Angiogenesis inhibitors for metastatic colorectal cancer
Source: PubMed Central journal article supplement — Transl Cancer Res. 2023 Dec 26;12(12):3241–4. doi: 10.21037/tcr-23-1568 (PMC10774035; doi:10.21037/tcr-23-1568), 2023-12-26
Supplement: tcr-12-12-3241-prf.pdf [file tcr-12-12-3241-prf.pdf]

## Peer Review File

Article Information: <https://dx.doi.org/10.21037/tcr-23-1568>

### Peer Review Comments

This is a really succinctly written review describing the current and future treatment paradigms for metastatic colorectal cancer. It covers all the major studies, efficacy and toxicity. I think this would be a great review for practicing oncologists for the role of angiogenesis inhibitors.

The authors could consider elaborating on some of the upcoming data in the field regarding immunotherapy with VEGF inhibition.

Reply: Thank you.
